# Supplementary material
Source: PubMed Central journal article supplement (PMC9890931)
Supplement: NIHMS1845221-supplement-2.pdf [file NIHMS1845221-supplement-2.pdf]

## SUPPLEMENTAL TABLES

| Gene Name | Subtype       | IQR    | 25%     | Median  | 75%     |
|-----------|---------------|--------|---------|---------|---------|
| AR        | Adeno-Classic | 675.1  | 15235.0 | 15705.2 | 15910.1 |
| AR        | Adeno-Immune  | 620.9  | 15095.6 | 15252.5 | 15716.5 |
| AR        | NE-Classic    | 5063.6 | 3782.9  | 7162.0  | 8846.5  |
| AR        | NE-Liver      | 3537.1 | 12274.4 | 15174.4 | 15811.4 |
| KLK3      | Adeno-Classic | 290.1  | 15104.9 | 15378.1 | 15395.0 |
| KLK3      | Adeno-Immune  | 312.2  | 15078.0 | 15295.4 | 15390.1 |
| KLK3      | NE-Classic    | 4327.1 | 5514.2  | 7710.7  | 9841.3  |
| KLK3      | NE-Liver      | 7686.8 | 7636.7  | 14850.0 | 15323.5 |
| SYP       | Adeno-Classic | 2178.4 | 3562.9  | 4389.9  | 5741.3  |
| SYP       | Adeno-Immune  | 1732.6 | 2941.2  | 3574.6  | 4673.8  |
| SYP       | NE-Classic    | 4736.5 | 4431.9  | 6349.0  | 9168.4  |
| SYP       | NE-Liver      | 3074.1 | 2946.8  | 3574.4  | 6020.9  |
| CHGA      | Adeno-Classic | 3565.9 | 2762.3  | 3839.0  | 6328.2  |
| CHGA      | Adeno-Immune  | 2766.8 | 2525.7  | 3386.9  | 5292.5  |
| CHGA      | NE-Classic    | 6152.3 | 7632.6  | 11189.3 | 13784.9 |
| CHGA      | NE-Liver      | 7406.9 | 2135.2  | 3140.4  | 9542.1  |

**Supplemental Table 1:** Median, Inter-Quartile Range (IQR), and 25<sup>th</sup> and 75<sup>th</sup> percentiles for Figure 2.

| Pathway Name                       | Subtype       | IQR   | 25%    | Median | 75%    |
|------------------------------------|---------------|-------|--------|--------|--------|
| HALLMARK_TNFA_SIGNALING_VIA_NFKB   | Adeno-Classic | 0.374 | -0.263 | -0.131 | 0.111  |
| HALLMARK_TNFA_SIGNALING_VIA_NFKB   | Adeno-Immune  | 0.469 | -0.192 | 0.063  | 0.277  |
| HALLMARK_TNFA_SIGNALING_VIA_NFKB   | NE-Classic    | 0.382 | -0.301 | -0.199 | 0.081  |
| HALLMARK_TNFA_SIGNALING_VIA_NFKB   | NE-Liver      | 0.392 | -0.136 | 0.015  | 0.256  |
| HALLMARK_IL6_JAK_STAT3_SIGNALING   | Adeno-Classic | 0.431 | -0.365 | -0.174 | 0.066  |
| HALLMARK_IL6_JAK_STAT3_SIGNALING   | Adeno-Immune  | 0.464 | -0.154 | 0.085  | 0.310  |
| HALLMARK_IL6_JAK_STAT3_SIGNALING   | NE-Classic    | 0.426 | -0.345 | -0.249 | 0.081  |
| HALLMARK_IL6_JAK_STAT3_SIGNALING   | NE-Liver      | 0.412 | -0.100 | 0.079  | 0.312  |
| HALLMARK_G2M_CHECKPOINT            | Adeno-Classic | 0.539 | -0.352 | -0.185 | 0.187  |
| HALLMARK_G2M_CHECKPOINT            | Adeno-Immune  | 0.534 | -0.290 | -0.026 | 0.245  |
| HALLMARK_G2M_CHECKPOINT            | NE-Classic    | 0.340 | 0.126  | 0.356  | 0.466  |
| HALLMARK_G2M_CHECKPOINT            | NE-Liver      | 0.524 | -0.130 | 0.224  | 0.394  |
| HALLMARK_ANDROGEN_RESPONSE         | Adeno-Classic | 0.325 | -0.059 | 0.089  | 0.266  |
| HALLMARK_ANDROGEN_RESPONSE         | Adeno-Immune  | 0.383 | -0.191 | 0.012  | 0.192  |
| HALLMARK_ANDROGEN_RESPONSE         | NE-Classic    | 0.133 | -0.439 | -0.381 | -0.306 |
| HALLMARK_ANDROGEN_RESPONSE         | NE-Liver      | 0.302 | -0.250 | -0.101 | 0.052  |
| HALLMARK_INTERFERON_ALPHA_RESPONSE | Adeno-Classic | 0.631 | -0.426 | -0.174 | 0.205  |
| HALLMARK_INTERFERON_ALPHA_RESPONSE | Adeno-Immune  | 0.627 | -0.263 | 0.057  | 0.364  |
| HALLMARK_INTERFERON_ALPHA_RESPONSE | NE-Classic    | 0.461 | -0.330 | -0.199 | 0.131  |
| HALLMARK_INTERFERON_ALPHA_RESPONSE | NE-Liver      | 0.544 | -0.169 | 0.189  | 0.375  |
| HALLMARK_INTERFERON_GAMMA_RESPONSE | Adeno-Classic | 0.531 | -0.374 | -0.198 | 0.157  |
| HALLMARK_INTERFERON_GAMMA_RESPONSE | Adeno-Immune  | 0.584 | -0.239 | 0.078  | 0.345  |
| HALLMARK_INTERFERON_GAMMA_RESPONSE | NE-Classic    | 0.446 | -0.356 | -0.165 | 0.090  |
| HALLMARK_INTERFERON_GAMMA_RESPONSE | NE-Liver      | 0.453 | -0.152 | 0.146  | 0.301  |
| HALLMARK_COMPLEMENT                | Adeno-Classic | 0.349 | -0.328 | -0.171 | 0.021  |
| HALLMARK_COMPLEMENT                | Adeno-Immune  | 0.411 | -0.143 | 0.081  | 0.267  |
| HALLMARK_COMPLEMENT                | NE-Classic    | 0.348 | -0.194 | -0.067 | 0.154  |
| HALLMARK_COMPLEMENT                | NE-Liver      | 0.239 | 0.056  | 0.195  | 0.295  |
| HALLMARK_E2F_TARGETS               | Adeno-Classic | 0.650 | -0.432 | -0.241 | 0.218  |
| HALLMARK_E2F_TARGETS               | Adeno-Immune  | 0.606 | -0.340 | -0.038 | 0.266  |
| HALLMARK_E2F_TARGETS               | NE-Classic    | 0.295 | 0.234  | 0.427  | 0.529  |
| HALLMARK_E2F_TARGETS               | NE-Liver      | 0.694 | -0.218 | 0.274  | 0.476  |
| HALLMARK_INFLAMMATORY_RESPONSE     | Adeno-Classic | 0.410 | -0.303 | -0.147 | 0.107  |
| HALLMARK_INFLAMMATORY_RESPONSE     | Adeno-Immune  | 0.431 | -0.134 | 0.113  | 0.297  |
| HALLMARK_INFLAMMATORY_RESPONSE     | NE-Classic    | 0.398 | -0.358 | -0.183 | 0.039  |
| HALLMARK_INFLAMMATORY_RESPONSE     | NE-Liver      | 0.402 | -0.190 | 0.028  | 0.212  |
| HALLMARK_IL2_STAT5_SIGNALING       | Adeno-Classic | 0.299 | -0.215 | -0.066 | 0.084  |
| HALLMARK_IL2_STAT5_SIGNALING       | Adeno-Immune  | 0.308 | -0.102 | 0.032  | 0.205  |
| HALLMARK_IL2_STAT5_SIGNALING       | NE-Classic    | 0.261 | -0.234 | -0.140 | 0.026  |
| HALLMARK_IL2_STAT5_SIGNALING       | NE-Liver      | 0.261 | -0.095 | 0.007  | 0.165  |
| HALLMARK_ALLOGRAFT_REJECTION       | Adeno-Classic | 0.434 | -0.337 | -0.182 | 0.097  |
| HALLMARK_ALLOGRAFT_REJECTION       | Adeno-Immune  | 0.494 | -0.159 | 0.093  | 0.336  |
| HALLMARK_ALLOGRAFT_REJECTION       | NE-Classic    | 0.458 | -0.364 | -0.197 | 0.094  |
| HALLMARK_ALLOGRAFT_REJECTION       | NE-Liver      | 0.397 | -0.278 | -0.036 | 0.118  |
| CIBERSORTX Absolute Immune Score   | Adeno-Classic | 0.122 | 1.259  | 1.310  | 1.381  |
| CIBERSORTX Absolute Immune Score   | Adeno-Immune  | 0.184 | 1.323  | 1.394  | 1.507  |
| CIBERSORTX Absolute Immune Score   | NE-Classic    | 0.229 | 1.231  | 1.333  | 1.460  |
| CIBERSORTX Absolute Immune Score   | NE-Liver      | 0.113 | 1.254  | 1.316  | 1.366  |

**Supplemental Table 2:** Median, Inter-Quartile Range (IQR), and 25<sup>th</sup> and 75<sup>th</sup> percentiles for Figure 3.

| Gene Name | Subtype       | Alteration Type                | Proportion |
|-----------|---------------|--------------------------------|------------|
| AR        | Adeno-Classic | Amplification and/or Mutation  | 0.853      |
| AR        | Adeno-Immune  | Amplification and/or Mutation  | 0.782      |
| AR        | NE-Classic    | Amplification and/or Mutation  | 0.326      |
| AR        | NE-Liver      | Amplification and/or Mutation  | 0.632      |
| FOXA1     | Adeno-Classic | Amplification and/or Mutation  | 0.239      |
| FOXA1     | Adeno-Immune  | Amplification and/or Mutation  | 0.365      |
| FOXA1     | NE-Classic    | Amplification and/or Mutation  | 0.442      |
| FOXA1     | NE-Liver      | Amplification and/or Mutation  | 0.289      |
| MYC       | Adeno-Classic | Amplification and/or Mutation  | 0.584      |
| MYC       | Adeno-Immune  | Amplification and/or Mutation  | 0.687      |
| MYC       | NE-Classic    | Amplification and/or Mutation  | 0.698      |
| MYC       | NE-Liver      | Amplification and/or Mutation  | 0.711      |
| PTEN      | Adeno-Classic | Biallelic Loss and/or Mutation | 0.426      |
| PTEN      | Adeno-Immune  | Biallelic Loss and/or Mutation | 0.216      |
| PTEN      | NE-Classic    | Biallelic Loss and/or Mutation | 0.209      |
| PTEN      | NE-Liver      | Biallelic Loss and/or Mutation | 0.395      |
| RB1       | Adeno-Classic | Biallelic Loss and/or Mutation | 0.066      |
| RB1       | Adeno-Immune  | Biallelic Loss and/or Mutation | 0.099      |
| RB1       | NE-Classic    | Biallelic Loss and/or Mutation | 0.628      |
| RB1       | NE-Liver      | Biallelic Loss and/or Mutation | 0.263      |
| TP53      | Adeno-Classic | Biallelic Loss and/or Mutation | 0.350      |
| TP53      | Adeno-Immune  | Biallelic Loss and/or Mutation | 0.242      |
| TP53      | NE-Classic    | Biallelic Loss and/or Mutation | 0.429      |
| TP53      | NE-Liver      | Biallelic Loss and/or Mutation | 0.368      |
| APC       | Adeno-Classic | Mutation Only                  | 0.010      |
| APC       | Adeno-Immune  | Mutation Only                  | 0.052      |
| APC       | NE-Classic    | Mutation Only                  | 0.023      |
| APC       | NE-Liver      | Mutation Only                  | 0.139      |
| SPOP      | Adeno-Classic | Mutation Only                  | 0.010      |
| SPOP      | Adeno-Immune  | Mutation Only                  | 0.107      |
| SPOP      | NE-Classic    | Mutation Only                  | 0.000      |
| SPOP      | NE-Liver      | Mutation Only                  | 0.139      |

**Supplemental Table 3:** Proportions for Figure 4.

| <b>Subtype</b> | <b>Biopsy Site</b> | <b>Phenotype</b> | <b>Proportion</b> |
|----------------|--------------------|------------------|-------------------|
| Adeno-Immune   | Liver              | Adenocarcinoma   | 0.083             |
| Adeno-Immune   | Lymph Node         | Adenocarcinoma   | 0.296             |
| Adeno-Immune   | Lung               | Adenocarcinoma   | 0.059             |
| Adeno-Immune   | Bone               | Adenocarcinoma   | 0.391             |
| Adeno-Immune   | Primary Site       | Adenocarcinoma   | 0.055             |
| Adeno-Immune   | Other              | Adenocarcinoma   | 0.083             |
| Adeno-Immune   | Liver              | SCNC             | 0.004             |
| Adeno-Immune   | Other              | SCNC             | 0.008             |
| Adeno-Immune   | Lung               | SCNC             | 0.008             |
| Adeno-Immune   | Lymph Node         | SCNC             | 0.008             |
| Adeno-Immune   | Primary Site       | SCNC             | 0.004             |
| NE-Classic     | Lymph Node         | Adenocarcinoma   | 0.102             |
| NE-Classic     | Other              | Adenocarcinoma   | 0.041             |
| NE-Classic     | Liver              | Adenocarcinoma   | 0.061             |
| NE-Classic     | Liver              | SCNC             | 0.143             |
| NE-Classic     | Lung               | SCNC             | 0.082             |
| NE-Classic     | Lymph Node         | SCNC             | 0.286             |
| NE-Classic     | Bone               | SCNC             | 0.041             |
| NE-Classic     | Other              | SCNC             | 0.184             |
| NE-Classic     | Bone               | Adenocarcinoma   | 0.020             |
| NE-Classic     | Primary Site       | SCNC             | 0.041             |
| Adeno-Classic  | Lymph Node         | Adenocarcinoma   | 0.639             |
| Adeno-Classic  | Lung               | Adenocarcinoma   | 0.050             |
| Adeno-Classic  | Primary Site       | Adenocarcinoma   | 0.040             |
| Adeno-Classic  | Other              | Adenocarcinoma   | 0.094             |
| Adeno-Classic  | Liver              | Adenocarcinoma   | 0.035             |
| Adeno-Classic  | Bone               | Adenocarcinoma   | 0.129             |
| Adeno-Classic  | Other              | SCNC             | 0.005             |
| Adeno-Classic  | Lymph Node         | SCNC             | 0.005             |
| Adeno-Classic  | Primary Site       | SCNC             | 0.005             |
| NE-Liver       | Liver              | Adenocarcinoma   | 0.706             |
| NE-Liver       | Liver              | SCNC             | 0.294             |

**Supplemental Table 4:** Proportions for Figure 5.
